# Supplementary material for: Metal–organic frameworks (MOFs) as highly efficient agents for boron removal and boron isotope separation
Source: Royal Society of Chemistry journal article supplement (doi:10.1039/c6ra26588j), 2017-01-01
Supplement: c6ra26588j1.pdf [file c6ra26588j1.pdf]

## Supplementary information

### **Metal-Organic Frameworks (MOFs) as highly efficient agents for boron removal and boron isotopes separation**

Jiafei Lyu, Hongxu Liu, Jingshuang Zhang, Zhouliangzi Zeng, Peng Bai, Xianghai Guo\*

\*Corresponding Author: Xianghai Guo

Fax: 86-22-27406186

Email: guoxh@tju.edu.cn

## **Contents**

**Section S1. Research on boron isotopes separation with boron adsorbents**

**Section S2. Summary of boron adsorbents.**

**Section S3. Characterization of ZIF-8**

**Section S4. Characterization of UiO-66**

**Section S5. Characterization of MIL-100(Fe)**

**Section S6. Characterization of MIL-101(Cr)**

**Section S7. Characterization of MIL-100(Cr)**

**Section S8. Characterization of MIL-53(Cr)**

**Section S9. Characterization of MIL-96(Al)**

**Section S10. Calculation of separation factor and adsorption capacity**

**Section S11. Boron concentration and isotopic abundance of residual boron aqueous solutions**

**Section S12. Boron adsorption mechanism**

**Section S13. References**

## Section S1. Research on boron isotopes separation with boron adsorbents

**Table S1** Research on boron isotopes separation with boron adsorbents.

| Adsorbents                                       | Temperature (°C) | pH                   | Boron concentration (mmol·L <sup>-1</sup> ) | Isotopes separation factor, S | Refs |
|--------------------------------------------------|------------------|----------------------|---------------------------------------------|-------------------------------|------|
| <b>Strongly basic anion exchange resin</b>       |                  |                      |                                             |                               |      |
| Amberlite CG-400I                                | R. T.            | Not mention          | 100 <sup>a</sup>                            | 1.016                         | 1    |
| Diaion PA-312                                    | 25               | >12 <sup>b</sup>     | 10.4                                        | 1.019                         | 2    |
| Diaion SA-20A                                    | 25               | 12 <sup>b</sup>      | 106                                         | 1.011                         | 2    |
| <b>Weakly basic anion exchange resin</b>         |                  |                      |                                             |                               |      |
| Diaion WA-21                                     | 5                | 10.5-11 <sup>b</sup> | 10.4                                        | 1.023                         | 2    |
| Diaion WA-10                                     | 25               | 11-11.5 <sup>b</sup> | 10.1                                        | 1.016                         | 2    |
| Diaion WA 30                                     | 25               | 11.5 <sup>b</sup>    | 9.99                                        | 1.017                         | 2    |
| Muromac 1×8                                      | 25               | neutral              | 0.10                                        | 1.018                         | 3    |
| Muromac 1×8                                      | 25               | neutral              | 0.10                                        | 1.012                         | 3    |
| <b>Boron-selective resin</b>                     |                  |                      |                                             |                               |      |
| CRB-02                                           | 25(50)           | Not mention          | 100                                         | 1.018-1.022                   | 4    |
| <i>N</i> -Methyl- <i>D</i> -Glucamine Type Resin | Not mention      | <7                   | 100 <sup>c</sup>                            | 1.027                         | 5    |
| <b>Clay</b>                                      |                  |                      |                                             |                               |      |
| Kaolin                                           | 20               | 5                    | 10.10                                       | 1.0023                        | 6    |
| Kaolin                                           | 25               | 5                    | 9.51                                        | 1.0011                        | 7    |
| <b>Other adsorbents</b>                          |                  |                      |                                             |                               |      |
| Mg(OH) <sub>2</sub>                              | 25               | 10.5                 | 45.9 <sup>c</sup>                           | 1.022                         | 8    |
| Humic acids                                      | 25               | 5                    | 3                                           | 1.027                         | 9    |

<sup>a</sup> containing 8 wt. % purified glycerol.

<sup>b</sup> pH of the resin phase.

## Section S2. Summary of boron adsorbents.

**Table S2** Summary of boron adsorbents.

| Adsorbents                                                                          | Temperature (°C) | pH    | Residual boron concentration (mmol·L <sup>-1</sup> ) | Adsorption capacity (mmol·g <sup>-1</sup> ) | Refs       |
|-------------------------------------------------------------------------------------|------------------|-------|------------------------------------------------------|---------------------------------------------|------------|
| <b>Chelating resins</b>                                                             |                  |       |                                                      |                                             |            |
| Amberlite IRA-743                                                                   | 25               | 7.0   | 8.00                                                 | 0.71                                        | 10         |
| Pyrocatechol modified resin                                                         | 25               | 9.0   | 2.00                                                 | 0.42                                        | 11         |
| poly( <i>N</i> -(4-vinylbenzyl)- <i>N</i> -methyl- <i>D</i> -glucamine) (P(VbNMDG)) | 25               | -     | 1.850 <sup>a</sup>                                   | 98% <sup>b</sup>                            | 12         |
| <b>Industrial waste</b>                                                             |                  |       |                                                      |                                             |            |
| Fly ash                                                                             | 25               | 10-11 | 1.00 <sup>a</sup>                                    | 94% <sup>b</sup>                            | 13         |
| Palm oil mill boiler bottom ash                                                     | 25               | 8.0   | 1.20                                                 | 0.0435                                      | 14         |
| Calcined magnesite tailing                                                          | 45               | 6.0   | 50.90                                                | 6.1                                         | 15         |
| <b>Natural materials</b>                                                            |                  |       |                                                      |                                             |            |
| Calcined Alunite                                                                    | 25               | 10.0  | 16.70                                                | 0.31                                        | 16         |
| Calcium alginate gel                                                                | 25               | 9-10  | 18.50 <sup>a</sup>                                   | 94                                          | 17         |
| Waste sepiolite                                                                     | 20               | 10    | 55.50 <sup>a</sup>                                   | 16.52                                       | 18         |
| <b>New type inorganic sorbents</b>                                                  |                  |       |                                                      |                                             |            |
| MG modified SBA-15                                                                  | 25               | 7-12  | 0.93 <sup>a</sup>                                    | 45% <sup>b</sup>                            | 19         |
| MG modified MCM-41                                                                  | 25               | 6     | 9.25×10 <sup>-4</sup> <sup>a</sup>                   | 0.8                                         | 20         |
| Mg/Al layered double hydroxide                                                      | 25               | 10    | 46.07 <sup>a</sup>                                   | 90% <sup>b</sup>                            | 21         |
| Si-MG                                                                               | 25               | 7     | 0.20                                                 | 1.54                                        | 22         |
| ZIF-8                                                                               | 25               | -     | 500 <sup>a</sup>                                     | 17.67                                       | This study |

<sup>a</sup> Initial boron concentrations (mmol·L<sup>-1</sup>).

<sup>b</sup> boron recovery efficiency.

## Section S3. Characterization of ZIF-8

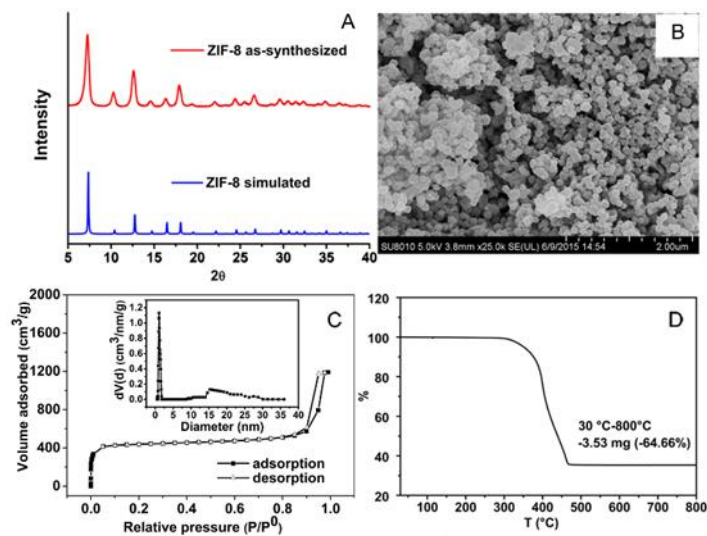

**Fig. S1.** Characterization of ZIF-8. a) XRD patterns; b) SEM image; c) N<sub>2</sub> adsorption/desorption isotherms and the pore size distribution (inset); d) TGA curve.

#### Section S4. Characterization of UiO-66

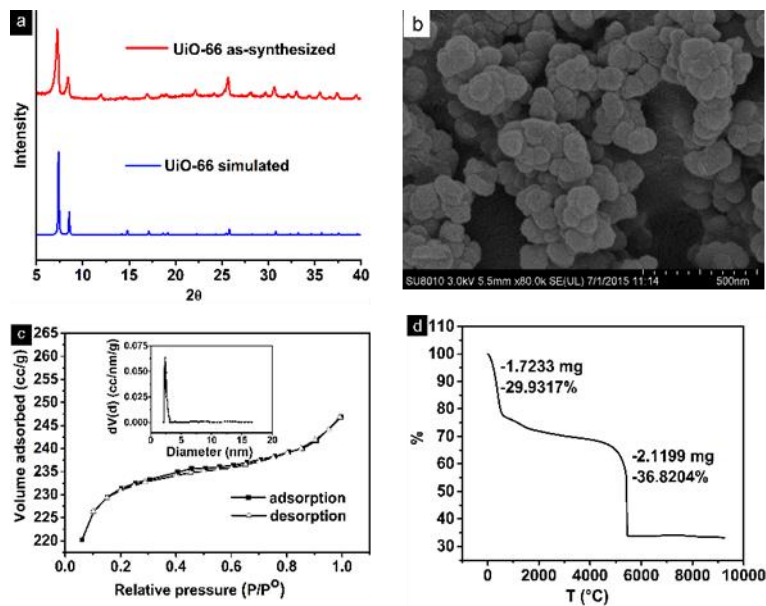

**Fig. S2.** Characterization of UiO-66. a) XRD patterns; b) SEM image; c) N<sub>2</sub> adsorption/desorption isotherms and the pore size distribution (inset); d) TGA curve.

#### Section S5. Characterization of MIL-100(Fe)

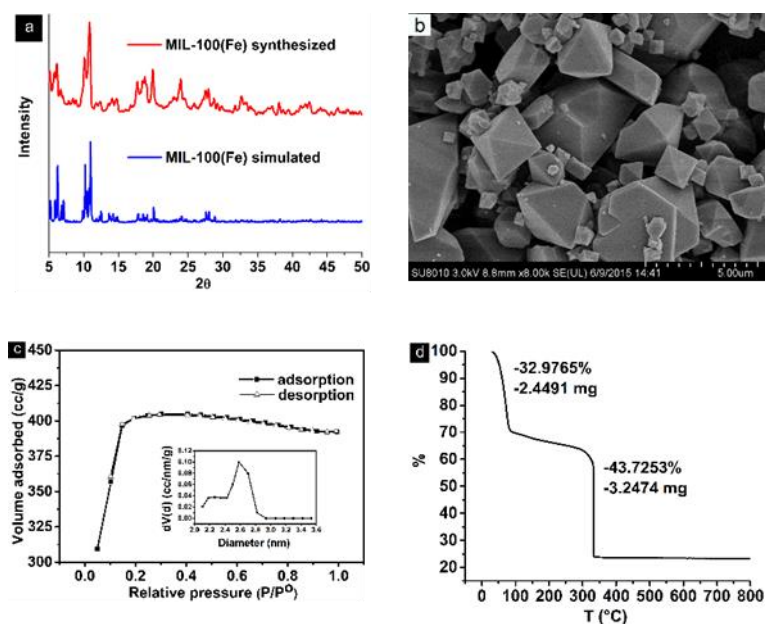

**Fig. S3.** Characterization of MIL-100(Fe). a) XRD patterns; b) SEM image; c) N<sub>2</sub> adsorption/desorption isotherms and the pore size distribution (inset); d) TGA curve.

### Section S6. Characterization of MIL-101(Cr)

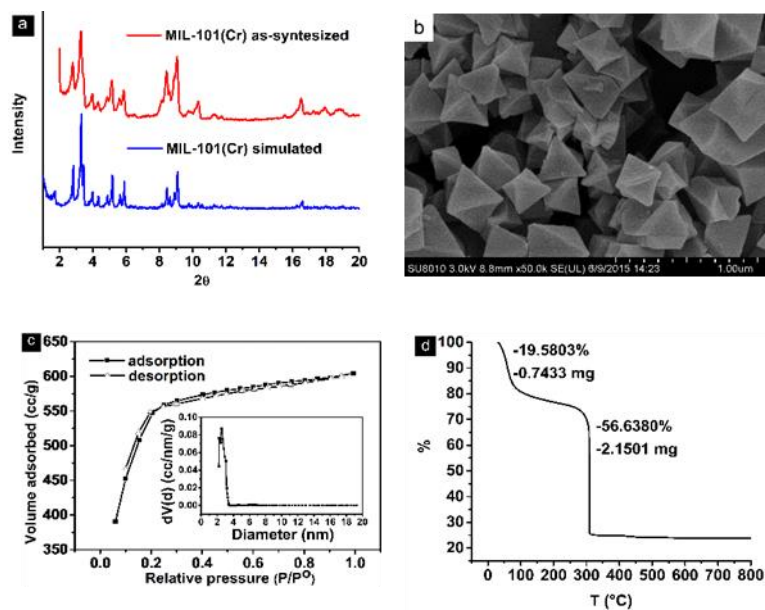

**Fig. S4.** Characterization of MIL-101(Cr). a) XRD patterns; b) SEM image; c) N<sub>2</sub> adsorption/desorption isotherms and the pore size distribution (inset); d) TGA curve.

### Section S7. Characterization of MIL-100(Cr)

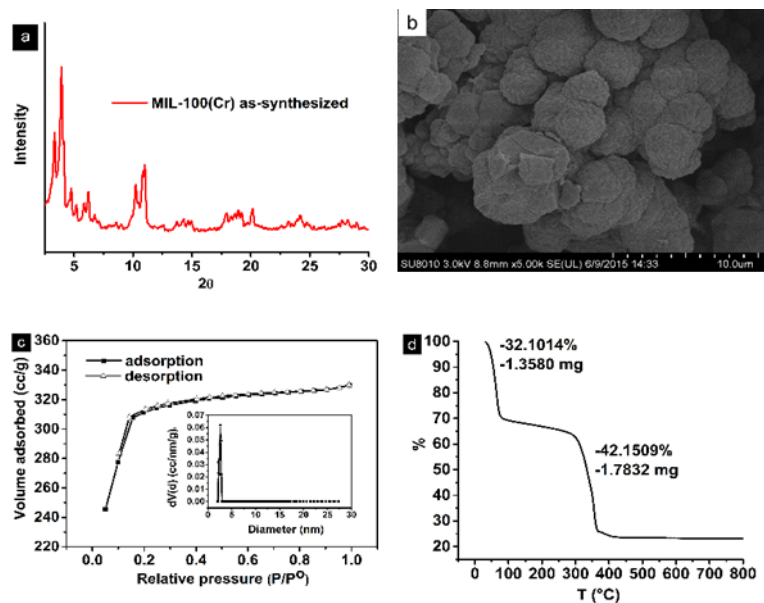

**Fig. S5.** Characterization of MIL-100(Cr). a) XRD patterns; b) SEM image; c) N<sub>2</sub> adsorption/desorption isotherms and the pore size distribution (inset); d) TGA curve.

### Section S8. Characterization of MIL-53(Cr)

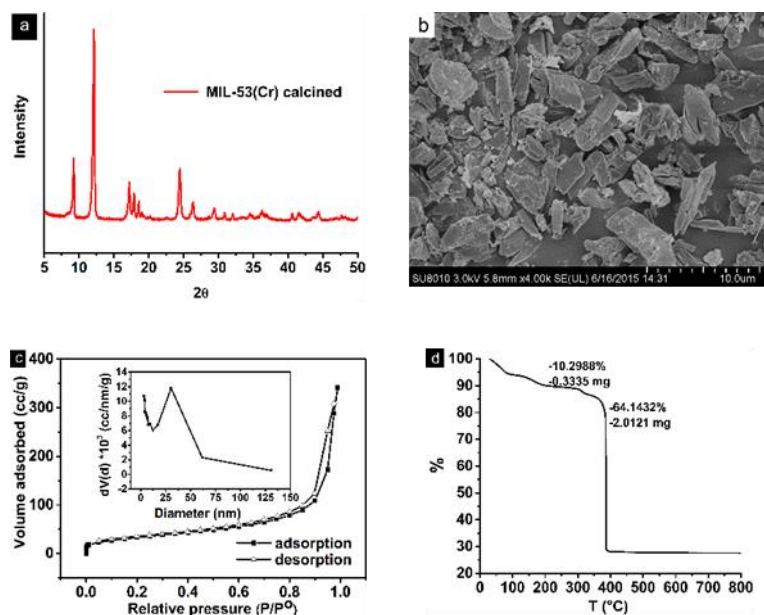

**Fig. S6.** Characterization of MIL-53(Cr). a) XRD patterns; b) SEM image; c) N<sub>2</sub> adsorption/desorption isotherms and the pore size distribution (inset); d) TGA curve.

### Section S9. Characterization of MIL-96(Al)

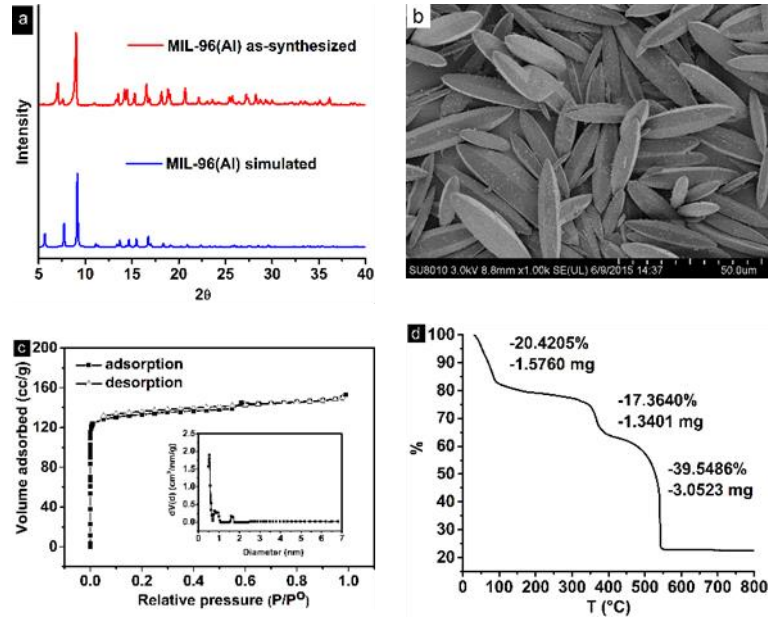

**Fig. S7.** Characterization of MIL-96(Al). a) XRD patterns; b) SEM image; c) N<sub>2</sub> adsorption/desorption isotherms and the pore size distribution (inset); d) TGA curve.

### Section S10. Calculation of separation factor and adsorption capacity

The boron adsorption capacity  $Q$  ( $\text{mg}\cdot\text{g}^{-1}$ ) can be calculated based on the following equation:

$$Q = \frac{(c_0 - c_1)M}{D} \times 1000 \quad (1)$$

where  $c_0$  represents initial boron concentration,  $\text{mol}\cdot\text{L}^{-1}$ ;  $c_1$  represents residual boron concentration,  $\text{mol}\cdot\text{L}^{-1}$ ;  $M$  means the molecular weight of boron,  $10.81 \text{ g}\cdot\text{mol}^{-1}$ ;  $D$  means the dosage of adsorbents,  $5 \text{ g}\cdot\text{L}^{-1}$ .

The separation factor  $S$  can be calculated according to following equation:

$$\begin{aligned} S(^{10}\text{B}/^{11}\text{B}) &= \frac{[^{10}\text{B}/^{11}\text{B}]_{\text{adsorbent}}}{[^{10}\text{B}/^{11}\text{B}]_{\text{solution}}} \\ &= \frac{\left[ c_0 \cdot \frac{\alpha_0}{\alpha_0 + 1} - c_1 \cdot \frac{\alpha_1}{\alpha_1 + 1} \right]}{\left[ c_0 \cdot \frac{1}{\alpha_0 + 1} - c_1 \cdot \frac{1}{\alpha_1 + 1} \right]} \bigg/ \alpha_1 \\ &= \frac{c_0 \alpha_0 (1 + \alpha_1) - c_1 \alpha_1 (1 + \alpha_0)}{c_0 \alpha_1 (1 + \alpha_1) - c_1 \alpha_1 (1 + \alpha_0)} \end{aligned} \quad (2)$$

$$S(^{11}\text{B}/^{10}\text{B}) = \frac{1}{S(^{10}\text{B}/^{11}\text{B})} \quad (3)$$



where  $\alpha_0$  represents initial  $^{10}\text{B}/^{11}\text{B}$  abundance, 0.24779;  $\alpha_1$  represents  $^{10}\text{B}/^{11}\text{B}$  abundance of the residual solution.

### Section S11. Boron concentration and isotopic abundance of residual boron aqueous solutions

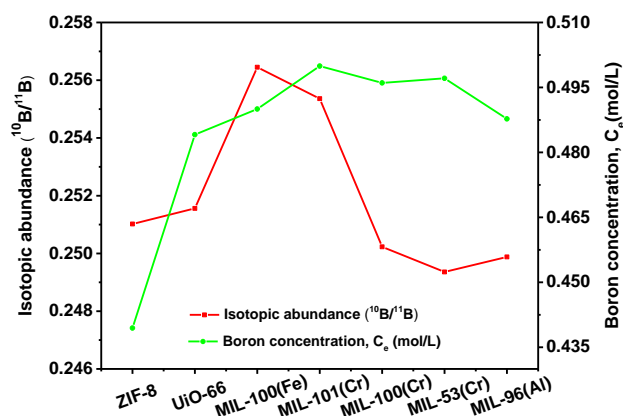

**Fig. S8.** boron concentration and isotopic abundance of residual boron aqueous solutions.

### Section S12. Boron adsorption mechanism on ZIF-8

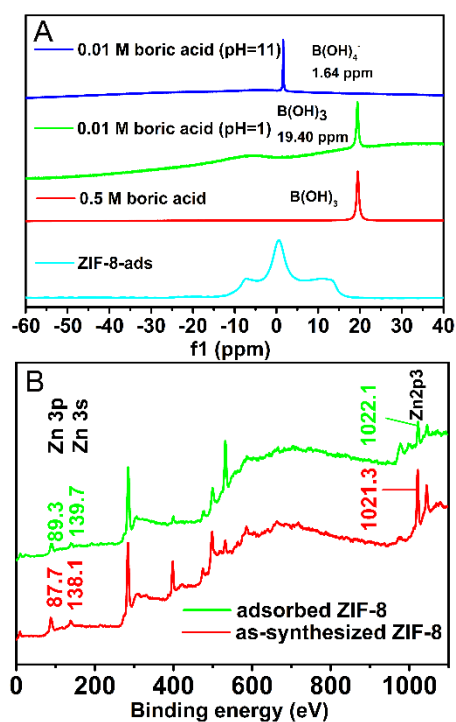

**Fig. S9** (A)  $^{11}\text{B}$  NMR of boric acid aqueous solutions and adsorbed ZIF-8; (B) XPS patterns of adsorbed and as-synthesized ZIF-8.

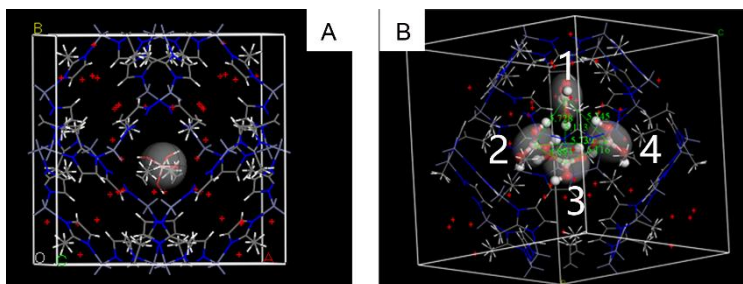

**Fig. S10** (A) Simulation of boron adsorption in the style of  $\text{B(OH)}_4^-$  on ZIF-8; (B) Simulation of boron adsorption in the style of  $\text{B(OH)}_3$  on ZIF-8. (Task: locate, Method: metropolis, Quality: customized, Force field: Universal).

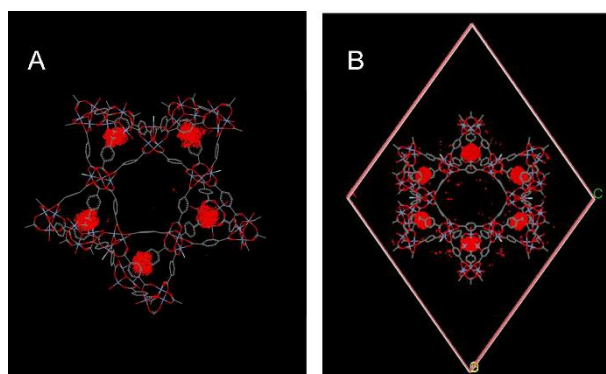

**Fig. S11** Simulation of boron adsorption in the style of  $\text{B(OH)}_3$  on MIL-101(Cr). The red in the cages represents the adsorbed boric acid molecules. (A) pentagonal window; (B) hexagonal window. (Task: locate, Method: metropolis, Quality: customized, Force field: Universal).

### Section S13. References

1. T. U. Yokio Yoneda, Shoji Makishima, *The Journal of Physical Chemistry*, 1959, **63**, 2057-2058.
2. M. K. H. Kakihana, S. Satoh, M. Nomura, M. Okamoto, *Bull. Chem. Soc. Jpn.*, 1977, **50**, 158-163.
3. M. Musashi, T. Oi, M. Matsuo and M. Nomura, *Journal of Chromatography A*, 2008, **1201**, 48-53.
4. T. Oi, H. Shimazaki, R. Ishii and M. Hosoe, *Sep. Sci. Technol.*, 1997, **32**, 1821-1834.
5. Y. M. K. O. Akinari Sonoda, Norio Takagi, Takahiro Hirotsu, *Bulletin of the Chemical Society of Japan*, 2000, **73**, 1131-1133.
6. M. Musashi, M. Matsuo, T. Oi and Y. Fujii, *Geochemical Journal*, 2005, **39**, 105-111.
7. M. Musashi, M. Matsuo, T. Oi and M. Nomura, *Journal of Nuclear Science and Technology*, 2006, **43**, 461-467.

8. J. Xiao, Y. Xiao, C. Liu, Z. Zhao, M. He and C. Liang, *Chinese Science Bulletin*, 2009, **54**, 3090-3100.
9. E. Lemarchand, J. Schott and J. Gaillardet, *Geochim Cosmochim Acta*, 2005, **69**, 3519-3533.
10. Y. T. Wei, Y. M. Zheng and J. P. Chen, *Water Res*, 2011, **45**, 2297-2305.
11. B. Wang, H. Lin, X. Guo and P. Bai, *Desalination*, 2014, **347**, 138-143.
12. P. Santander, B. L. Rivas, B. F. Urbano, İ. Yılmaz İpek, G. Özkula, M. Arda, M. Yüksel, M. Bryjak, T. Kozlecki and N. Kabay, *Desalination*, 2013, **310**, 102-108.
13. S. Yüksel and Y. Yürüm, *Sep. Sci. Technol.*, 2009, **45**, 105-115.
14. M. F. Chong, K. P. Lee, H. J. Chieng and R. Syazwani Binti, II, *Water Res*, 2009, **43**, 3326-3334.
15. I. Kipcak and M. Ozdemir, *Chem. Eng. J.*, 2012, **189**, 68-74.
16. D. Kavak, *J Hazard Mater*, 2009, **163**, 308-314.
17. M. Ruiz, C. Tobalina, H. Demey-Cedeño, J. A. Barron-Zambrano and A. M. Sastre, *Reactive and Functional Polymers*, 2013, **73**, 653-657.
18. D. K. N. Öztürk, *Adsorption*, 2004, **10**, 245-257.
19. T. Ben Amor, I. dhaouadi, B. Lebeau, M. Tili and M. Ben Amor, *Desalination*, 2014, **351**, 82-87.
20. Ö. Kaftan, M. Açıkel, A. E. Eroğlu, T. Shahwan, L. Artok and C. Ni, *Anal Chim Acta*, 2005, **547**, 31-41.
21. M. Kurashina, T. Inoue, C. Tajima and E. Kanezaki, *Mod Phys Lett B*, 2015, **29**, 5.
22. L. Xu, Z. X. Miao, L. L. Fan and P. E. S. Ieee, *2012 Ieee Pes Transmission and Distribution Conference and Exposition (T&D)*, 2012.
